# Supplementary material
Source: Springer Nature journal article supplement (https://www.springermedizin.de/resource/supplementary/12985_2011_1532_MOESM9_ESM.pdf/9610064)

Influenza A virus antigen

SNA lectin staining

SIV H1N1, lung

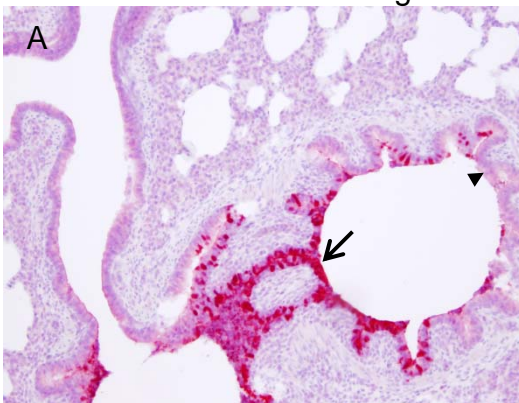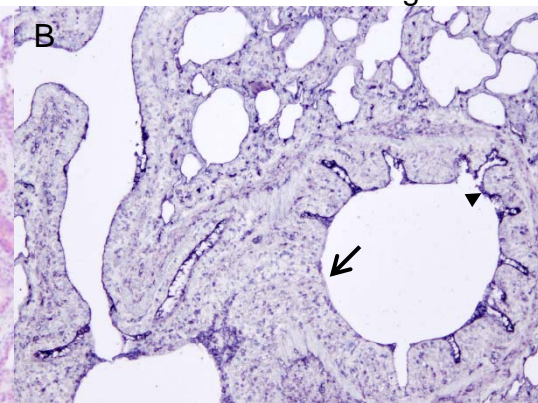

SIV H1N1, lung

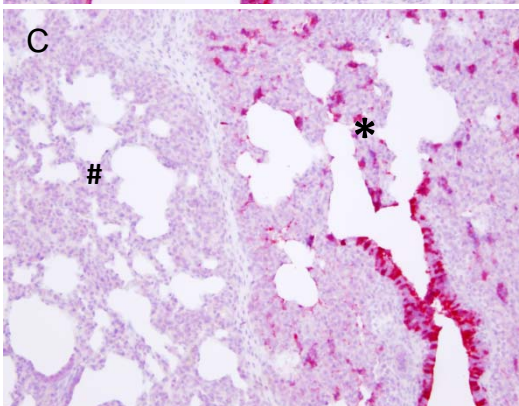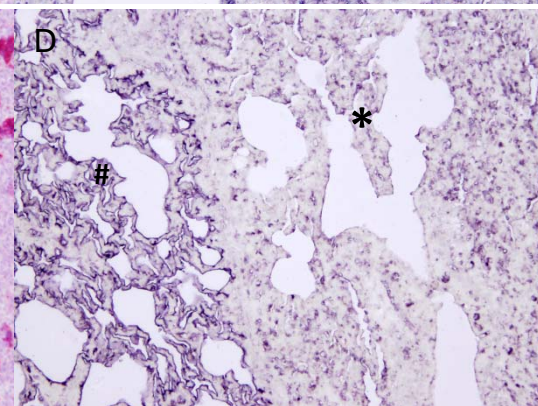

AIV H4N6, lung

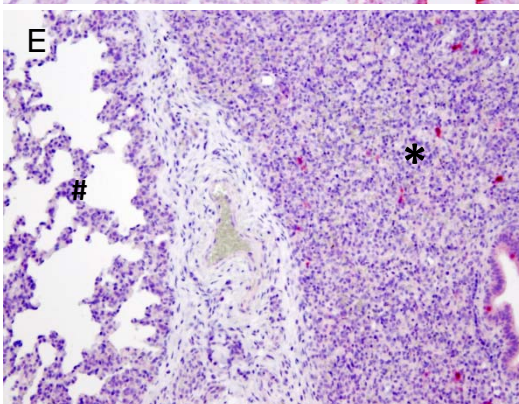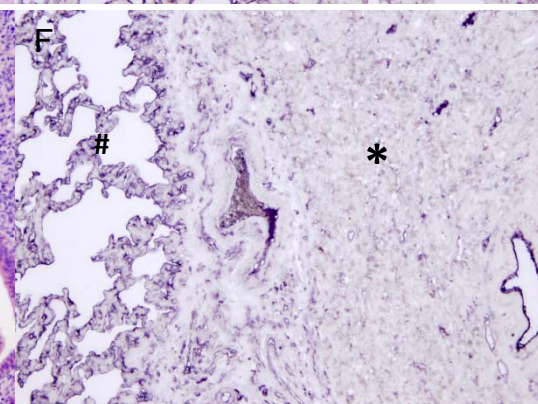

Supplement: MOESM9 [file 9610064]
